# Supplementary material for: The HIF-prolyl hydroxylases have distinct and nonredundant roles in colitis-associated cancer
Source: JCI journal article supplement (doi:10.1172/jci.insight.153337), 2022-11-21
Supplement: sd1 [file 1]

## Supplemental Material for

### The HIF-prolyl hydroxylases have distinct and non-redundant roles in colitis-associated cancer

Kilian B. Kennel<sup>1</sup>, Julius Burmeister<sup>1</sup>, Praveen Radhakrishnan<sup>1</sup>, Nathalia A. Giese<sup>1</sup>, Thomas Giese<sup>2</sup>, Martin Salfenmoser<sup>1</sup>, Jasper M. Gebhardt<sup>1</sup>, Moritz J. Strowitzki<sup>1</sup>, Cormac T. Taylor<sup>3</sup>, Ben Wielockx<sup>4</sup>, Martin Schneider<sup>1</sup>, and Jonathan M. Harnoss<sup>1,\*</sup>

<sup>1</sup>Department of General, Visceral and Transplantation Surgery, University Hospital Heidelberg, Heidelberg, Germany

<sup>2</sup>Institute of Immunology, University Hospital Heidelberg, Heidelberg, Germany

<sup>3</sup>School of Medicine, Systems Biology Ireland and the Conway Institute of Biomolecular and Biomedical Research, University College Dublin, Dublin, Ireland

<sup>4</sup>Institute for Clinical Chemistry and Laboratory Medicine, Dresden University of Technology, Dresden, Germany

\*Corresponding author: Department of General, Visceral and Transplantation Surgery, Heidelberg University, Im Neuenheimer Feld 420, 69120 Heidelberg. Phone: +49-6221-566110; Email: Jonathan.harnoss@med.uni-heidelberg.de

**Authorship note:** KBK and JB are co-first authors and contributed equally to the manuscript. MSch and JMH are co-last authors and contributed equally to the manuscript.

#### This file includes:

- Supplemental Methods
- Supplemental Figures 1-7 including Figure legends
- Supplemental Tables 1 and 2
- References for Supplemental Data

## SUPPLEMENTAL METHODS

### *Histology, immunohistochemistry, immunofluorescence*

For histology and IHC, tumor-bearing colons were fixed as “swiss rolls” using formalin and ethanol, embedded in paraffin, and cut at 5 µm thickness (1). A subset of tumors was frozen and processed for cryosectioning and subsequent IF staining. Paraffin-embedded tissue sections were dewaxed using xylene and a graded series of ethanol. H&E staining was performed for microscopic analysis of mucosal damage using a previously described scoring system (2) (**Supplemental Table 1**). Two blinded observers assessed histology scores using a Zeiss Axiostar Plus microscope in combination with an AxioCam MRC camera (Zeiss, Jena, Germany). For IHC, citrate-based antigen retrieval was performed (Dako Target Retrieval Solution, Agilent, Santa Clara, California, USA., #S1699) and sections were incubated overnight at 4°C with the following primary antibodies: PCNA (1:500, Abcam, Cambridge, UK, #265585), CC3 (1:100, Cell Signaling Technology (CST), Danvers, Massachusetts, USA, #9661), F4/80 (1:100, BioRad, Hercules, California, USA, #MCA497), CD3 (1:100, Abcam, #5690), pSTAT3 (1:100, CST, #9145), ERK1/2 (1:1000, CST, #9102), pERK1/2 (1:1000, CST, #9101). For IF on cryosections, a CD11c primary antibody was used (1:100, ThermoFisher Scientific, Waltham, Massachusetts, USA, #14-0114-82). After incubation with appropriate horse radish peroxidase or FITC (for IF-coupled secondary antibodies), detection was carried out using the Liquid DAB+ Substrate Chromogen System (Dako, #K3468). Quantification of positive cells was performed by two blinded investigators using a Zeiss Axiostar Plus microscope in combination with an AxioCam MRC camera (Zeiss).

### *qRT-PCR*

RNA was isolated from murine colonic tumor and mucosa samples using the RNeasy Mini Kit (Qiagen, Hilden, Germany, #74104). cDNA was synthesized using the ImProm-II™ Reverse Transcription System (Promega, Mannheim, Germany, #A3800). qRT-PCR was performed on a LightCycler 480 system (Roche, Mannheim, Germany) using SYBR Green as a dye. Relative transcript expression was analyzed employing the  $\Delta\Delta C_t$  method with *18S rRNA (Rn18s)* or *actin beta (Actb)* as housekeeping genes. Primer sequences are listed in **Supplemental Table 2**.

### *Immunoblot*

Protein from size- and location-matched AOM/DSS tumors was isolated using the AllPrep DNA/RNA/Protein Mini Kit (Qiagen, #80004). Isolated protein was quantified using the Pierce<sup>TM</sup> BCA Protein Assay Kit (ThermoFisher Scientific, #23225), and equal amounts were loaded for gel electrophoresis. Primary antibodies against STAT3 (1:1000, CST, #9139), pSTAT3 (1:1000, CST, #9145), ERK1/2 (1:1000, CST, #9102), pERK1/2 (1:1000, CST, #9101), ACTB (1:5000, Abcam, #8227) as well as an HRP-conjugated secondary antibody (1:5000, Abcam, #6721) were used for detection of the respective proteins.

### *Flow cytometry*

The following antibodies were used to characterize lymphoid populations in AOM/DSS tumors: APC-R700-CD45 (30-F11) (BioLegend, 103128), Brilliant Violet 605-CD3 (17A2) (BioLegend, 100237), PE-CF594-CD4 (RM4-5) (BD, 562285), APC-C7, CD8a (53-6.7) (BioLegend, 100714), BB515-CD19 (1D3) (BD, 564531), Brilliant Violet 421-CD25 (PC61) (BD, 562606), APC-CD127, (SB/199), (BD, 564175), CD335/NKp46 (29A1.4) (BD, 560757).

For characterization of myeloid populations in AOM/DSS tumors, the following antibodies were used: APC-R700-CD45 (30-F11) (BioLegend, 103128), PE-Cy7-CD11b (M1/70) (BioLegend, 101216), Brilliant Violet 421-CD11c, (N418) (BioLegend, 117330), AF488-CD80 (16-10A1) (BioLegend, 104716), Brilliant Violet-786-CD86 (GL1) (BioLegend, 105043), PE-CF594-CD163 (S15049I) (BioLegend, 155316), PE -CD197/CCR7 (4B12) (BD, 560682), AF647-CD206 (MR5D3) (BD, 565250), APC-C7-F4/80 (BM8) (BioLegend, 123118), PerCP-Cy5.5-Ly-6C (HK1.4) (BioLegend, 128012) Brilliant Violet 605-Ly-6G (1A8) (BioLegend, 127639), BV510-MHC class II (M5/114.15.2) (BioLegend, 107636), BUV395-CD3 (17A2), (BD, 740268), BUV395-CD19 (1D3) (BD, 563557), BUV395-CD335/NKp46 (29A1.4) (BD, 740326). Incubation was performed in Brilliant Stain Buffer (BD, 563794). DAPI was added before data acquisition to identify viable cells.

### *Isolation of BMDMs*

BMDMs were isolated as previously described (3). Briefly, femora and tibiae of WT and *Phd2*<sup>+/-</sup> mice were flushed with PBS, and bone marrow cells were differentiated to macrophages in RPMI-1640 medium supplied with 10% FCS, 1% Penicillin/Streptomycin, 2 mM L-Glutamine and 10 ng/ml murine M-CSF (R&D Systems, Minneapolis, Minnesota, USA, #416-ML) for seven days prior to experiments. For experiments, BMDMs were incubated for 24 hours with control media (RPMI-1640 medium supplied with 1% FCS), 100 ng/ml LPS in control media (Sigma-Aldrich, St. Louis, Missouri, USA, #L2630), 20 ng/ml TNF $\alpha$  in control media (R&D Systems, #410-MT), or 20 ng/ml IL-4 in control media (R&D Systems, #404-ML).

## SUPPLEMENTAL FIGURES AND FIGURE LEGENDS

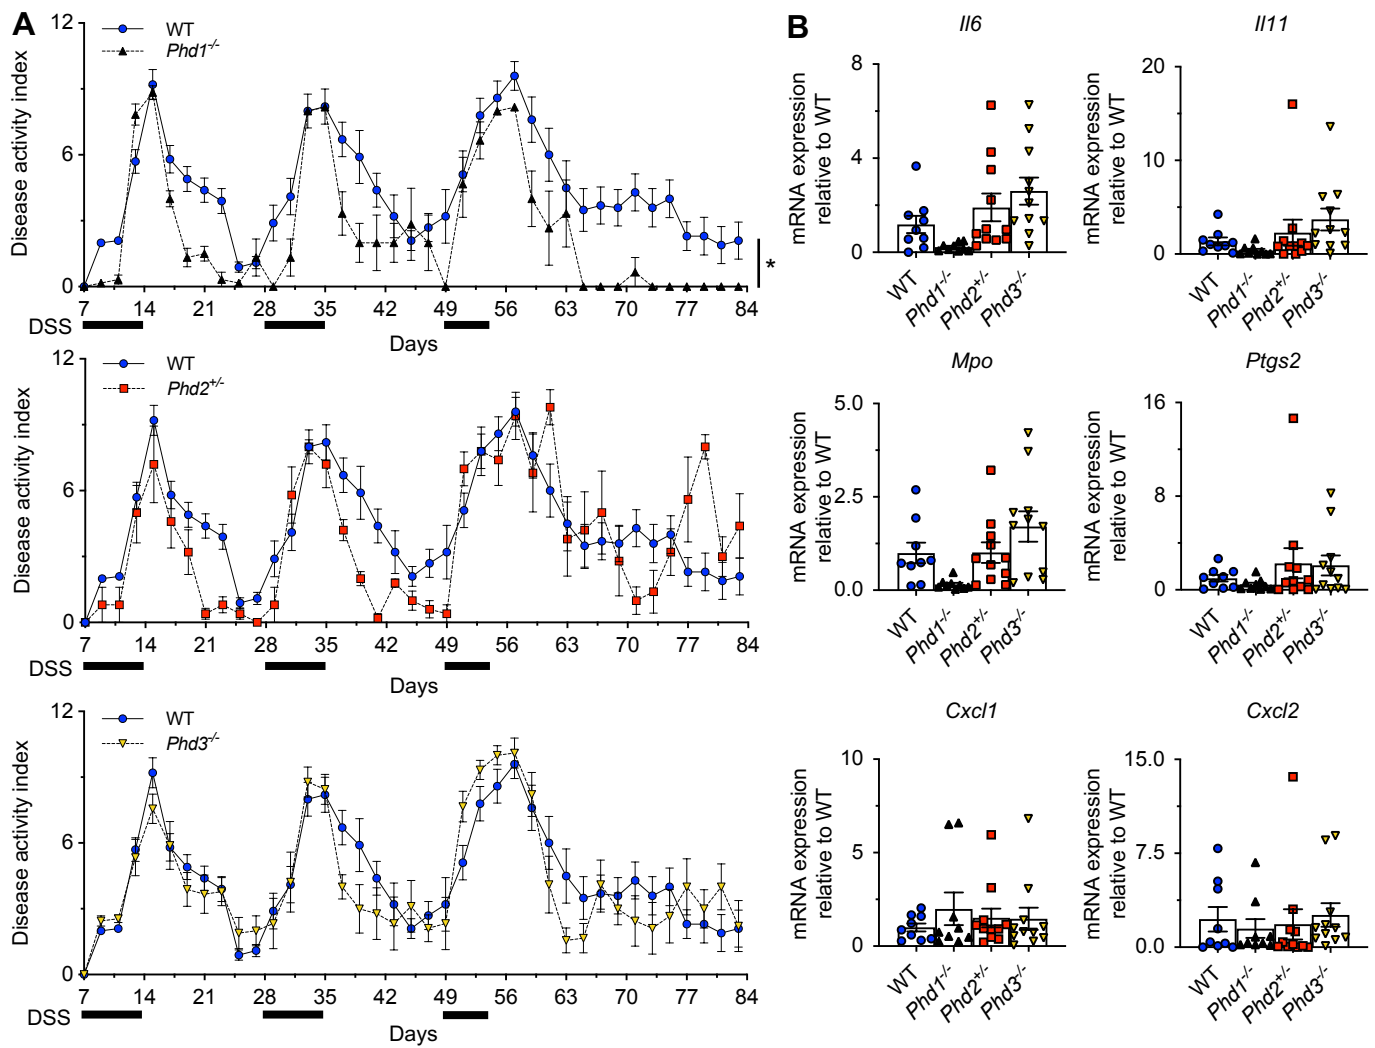

**Supplemental Figure 1. (A)** Disease activity index (DAI) scores from WT (n = 10), *Phd1*<sup>-/-</sup> (n = 6), *Phd2*<sup>+/-</sup> (n = 5), and *Phd3*<sup>-/-</sup> (n = 9) mice over the course of AOM/DSS treatment. The DAI was calculated every other day. **(B)** qRT-PCR analysis of pro-inflammatory mRNA expression in non-tumorous colon tissue samples from WT (n = 9), *Phd1*<sup>-/-</sup> (n = 9), *Phd2*<sup>+/-</sup> (n = 11), and *Phd3*<sup>-/-</sup> (n = 11) mice at day 84. Statistical significance was calculated using 2-way ANOVA **(A)** or 1-way ANOVA with Dunnett's multiple comparisons test **(B)**. \**P* < 0.05.

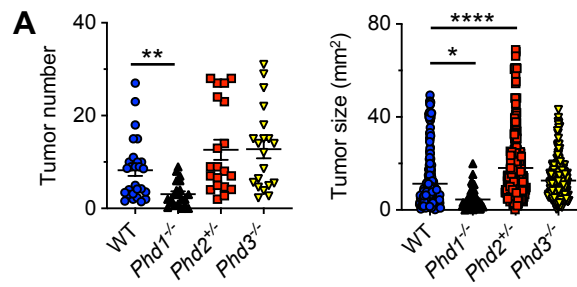

**Supplemental Figure 2. (A)** Macroscopic quantification of AOM/DSS-induced tumors. Pooled number of tumors per mouse (*left*; WT: n = 27,  $Phd1^{-/-}$ : n = 21,  $Phd2^{+/-}$ : n = 20,  $Phd3^{-/-}$ : n = 20 mice) and pooled size of individual tumors (*right*; WT: n = 220,  $Phd1^{-/-}$ : n = 63,  $Phd2^{+/-}$ : n = 255,  $Phd3^{-/-}$ : n = 243 tumors) of 4 studies in total. Statistical significance was calculated using 1-way ANOVA with Dunnett's multiple comparisons test. \* $P < 0.05$ , \*\* $P < 0.01$ , \*\*\*\* $P < 0.0001$ .

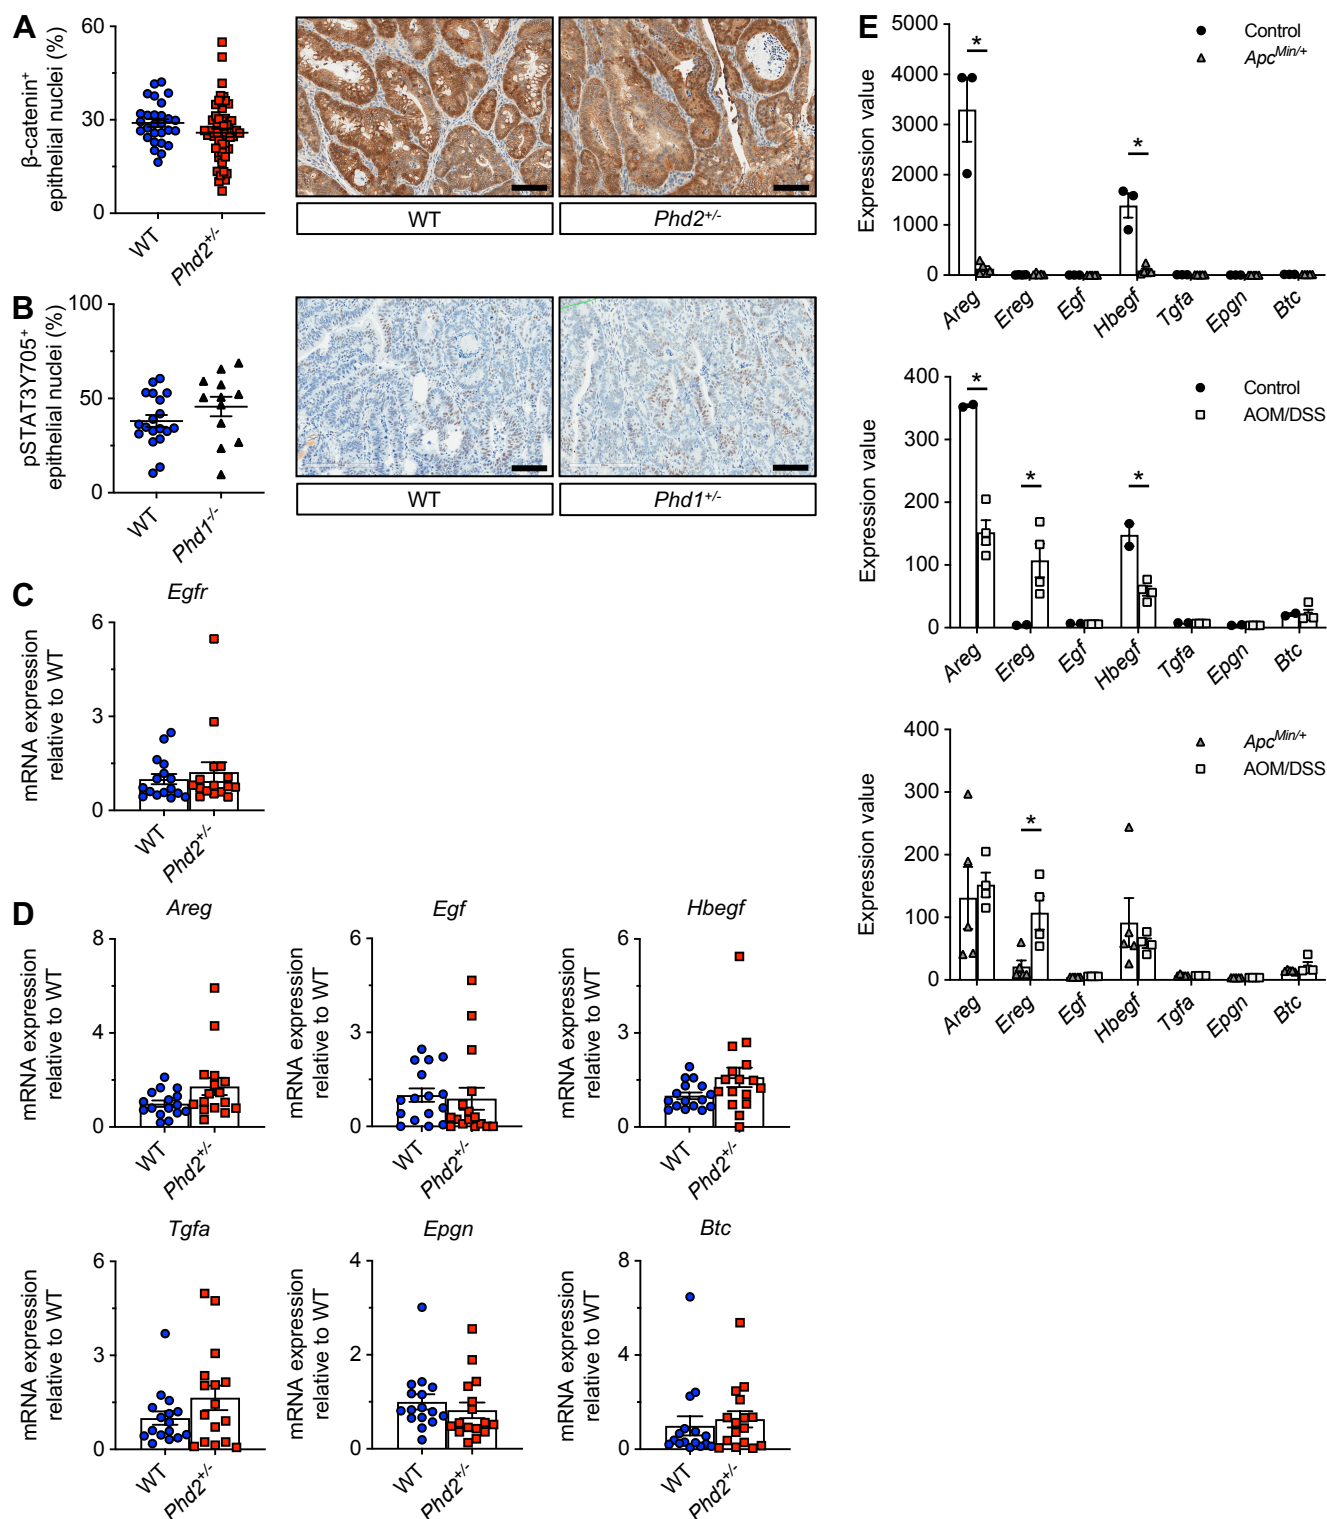

**Supplemental Figure 3.** (A) Quantification of epithelial nuclear β-catenin immunostaining in WT (n = 28) and *Phd2*<sup>+/-</sup> (n = 54) tumors and representative histological images. Scale bar = 100 μm. (B) Quantification of epithelial nuclear pSTAT3Y705 immunostaining in WT (n = 19) and *Phd1*<sup>+/-</sup> (n = 12) tumors and representative histological images. Scale bar = 100 μm. (C, D) qRT-PCR analysis of *Egfr* (C) and EGFR ligands mRNA expression (D) in WT (n = 16) and *Phd2*<sup>+/-</sup> (n = 16) tumors. (E) Re-analysis of a publicly available high-density microarray data set that includes transcriptomes from size- and location-matched AOM/DSS-induced and sporadic *Apc*<sup>Min/+</sup> tumors and respective controls (4). Statistical significance was calculated using 1-way ANOVA with Dunnett's multiple comparisons test (A) or Student's *t* test (B - E). \**P* < 0.05.

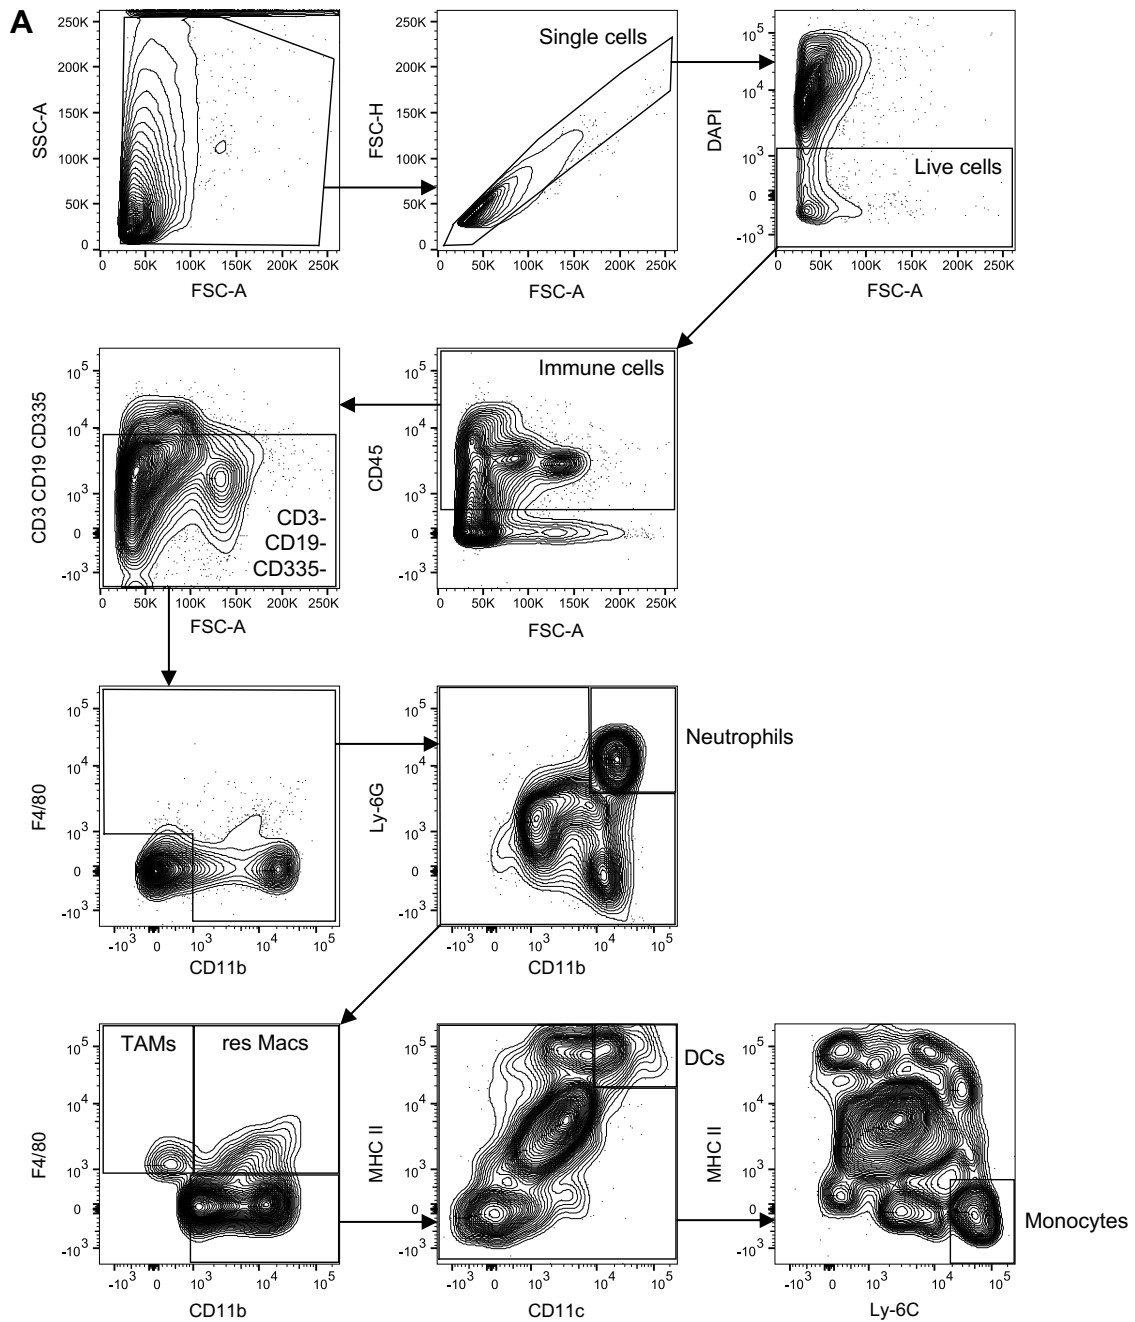

**Supplemental Figure 4. (A)** Flowcytometry gating strategy for myeloid populations in AOM/DSS tumors as previously established (5). First, single live cells were identified based on their FSC and SSC properties and DAPI staining. Next, immune cells (CD45<sup>+</sup>) were gated, and T, B, and NK cells excluded via CD3, CD19, and CD335 dump staining. Myeloid cells were then defined as neutrophils (CD45<sup>+</sup>, CD3<sup>-</sup>, CD19<sup>-</sup>, CD335<sup>-</sup>, Ly-6G<sup>+</sup>, CD11b<sup>+</sup>), Tumor-associated macrophages (TAMs, CD45<sup>+</sup>, CD3<sup>-</sup>, CD19<sup>-</sup>, CD335<sup>-</sup>, Ly-6G<sup>-</sup>, F4/80<sup>+</sup>, CD11b low), resident macrophages (res Macs, CD45<sup>+</sup>, CD3<sup>-</sup>, CD19<sup>-</sup>, CD335<sup>-</sup>, Ly-6G<sup>-</sup>, F4/80<sup>+</sup>, CD11b high), dendritic cells (DCs, CD45<sup>+</sup>, CD3<sup>-</sup>, CD19<sup>-</sup>, CD335<sup>-</sup>, Ly-6G<sup>-</sup>, F4/80<sup>-</sup>, CD11b<sup>+</sup>, MHCII<sup>+</sup>, CD11c<sup>+</sup>), monocytes (Mono, CD45<sup>+</sup>, CD3<sup>-</sup>, CD19<sup>-</sup>, CD335<sup>-</sup>, Ly-6G<sup>-</sup>, F4/80<sup>+</sup>, CD11b<sup>+</sup>, MHCII<sup>-</sup>, CD11c<sup>-</sup>, Ly-6C<sup>+</sup>). Representative contour plots from a *Phd2*<sup>+/-</sup> mouse.



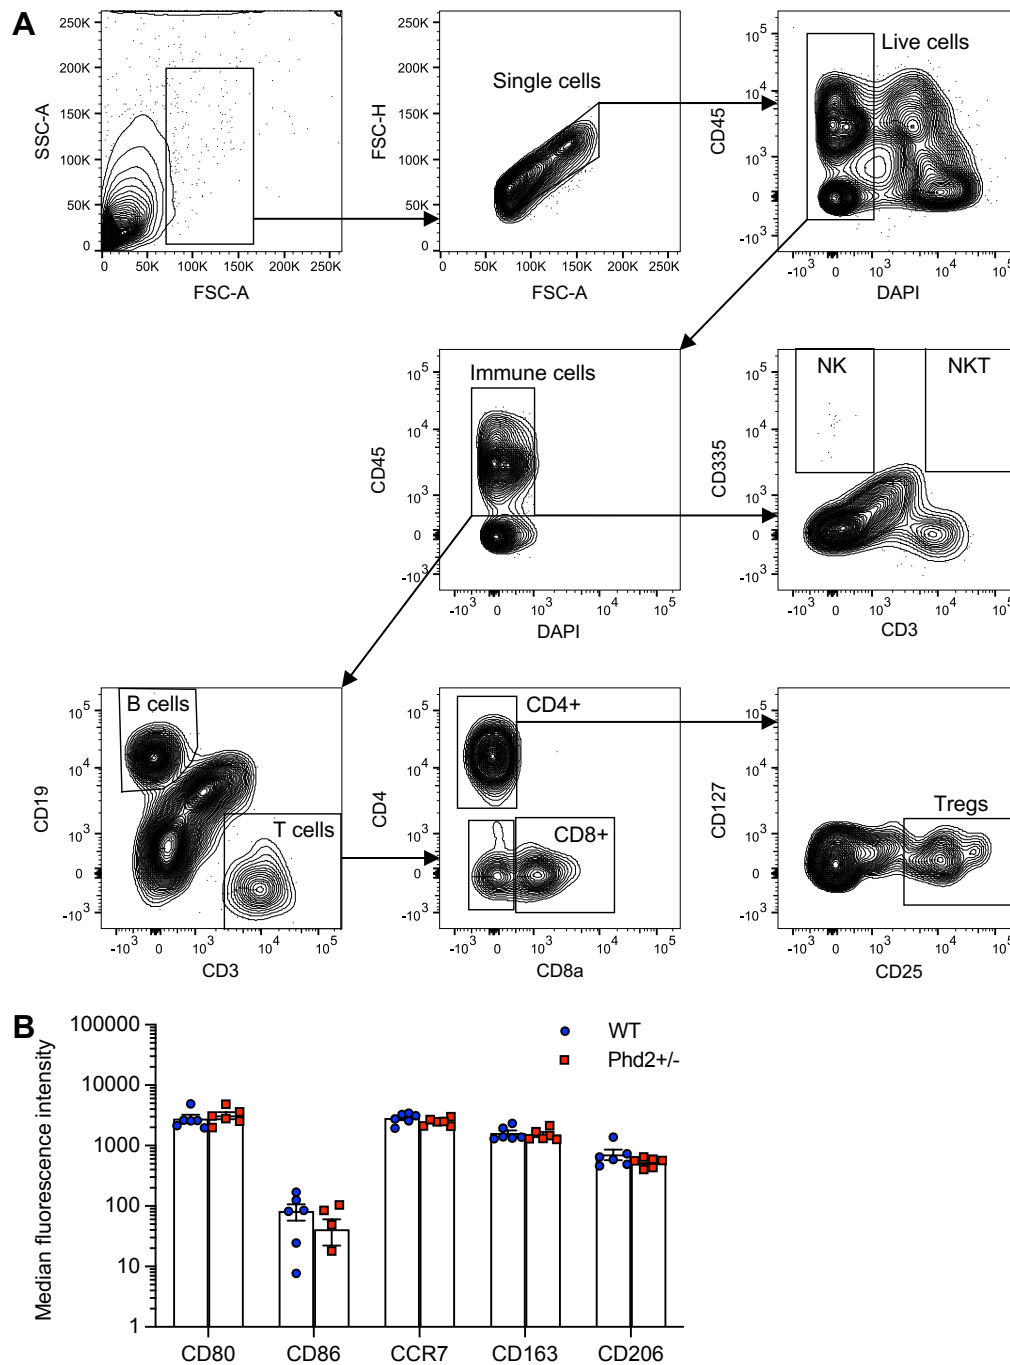

**Supplemental Figure 5. (A)** Flow cytometry gating strategy for lymphoid populations in AOM/DSS tumors. First, single live immune cells were identified based on their FSC and SSC properties, CD45, and DAPI staining. Next, lymphoid cells were defined as B cells (CD45+, CD19+), NK cells (CD45+, CD3-, CD335+), NKT cells (CD45+, CD3+, CD335+), T cells (CD45+, CD3+), Th cells (CD45+, CD3+, CD4+), regulatory T cells (Tregs, CD45+, CD3+, CD4+, CD127-, CD25+) and cytotoxic T cells (CD45+, CD3+, CD8+). Representative contour plots from a WT mouse. **(B)** Median fluorescence intensity for M1 (CD80, CD86, CCR7) and M2 (CD163, CD206) macrophage polarization markers within the TAM population in tumors from *Phd2*<sup>+/-</sup> (n = 6) and WT (n = 6) control mice. Statistical significance was calculated using Student's *t* test.

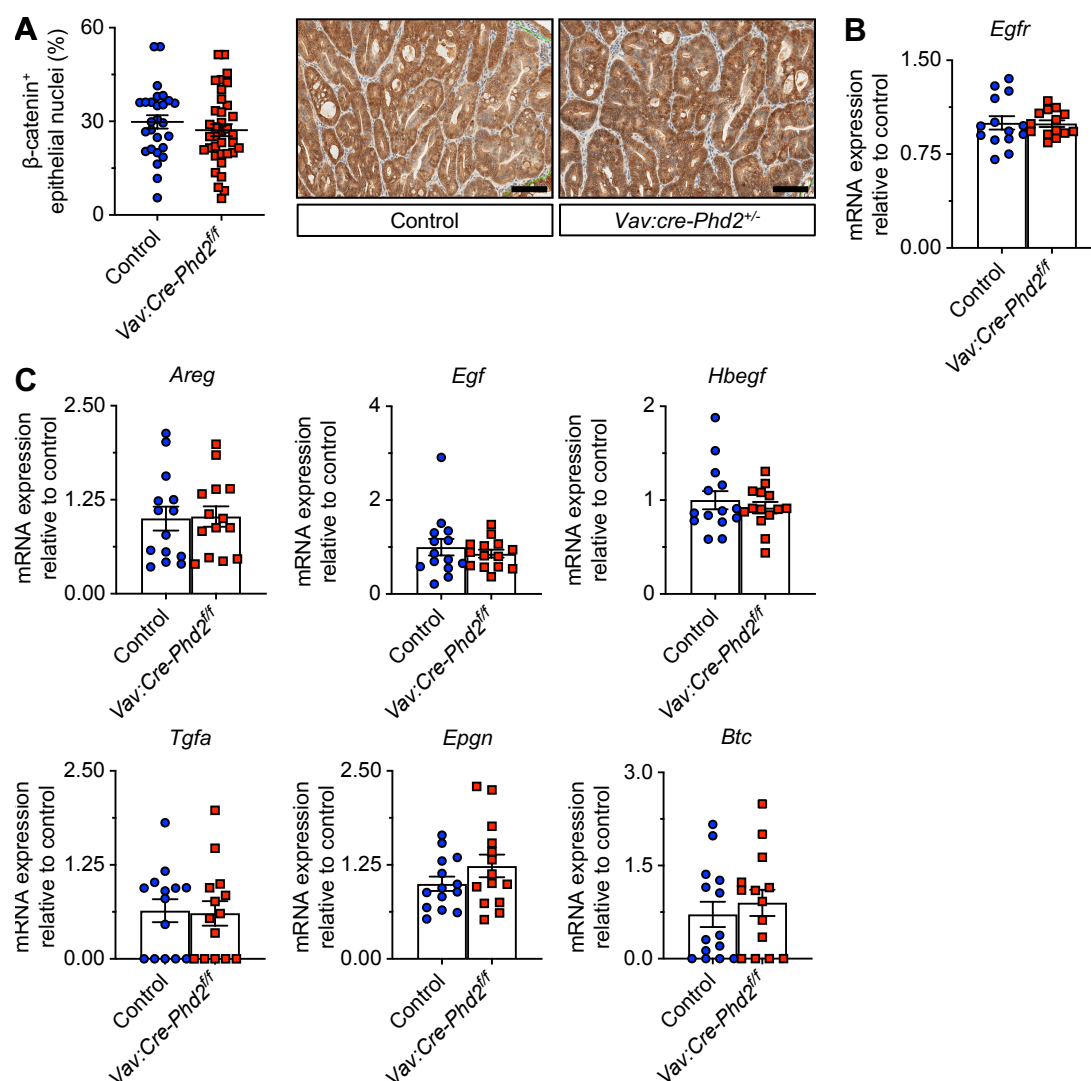

**Supplemental Figure 6.** (A) Quantification of epithelial nuclear  $\beta$ -catenin immunostaining in *Phd2*<sup>ff</sup> (control, n = 27) and *Vav:Cre-Phd2*<sup>ff</sup> mice (n = 36) and representative histological images (right). Scale bar = 100  $\mu$ m. (B-C) qRT-PCR analysis of *Egfr* (B) and EGFR ligands (C) mRNA expression in control (n = 14) and *Vav:Cre-Phd2*<sup>ff</sup> mice (n = 14).

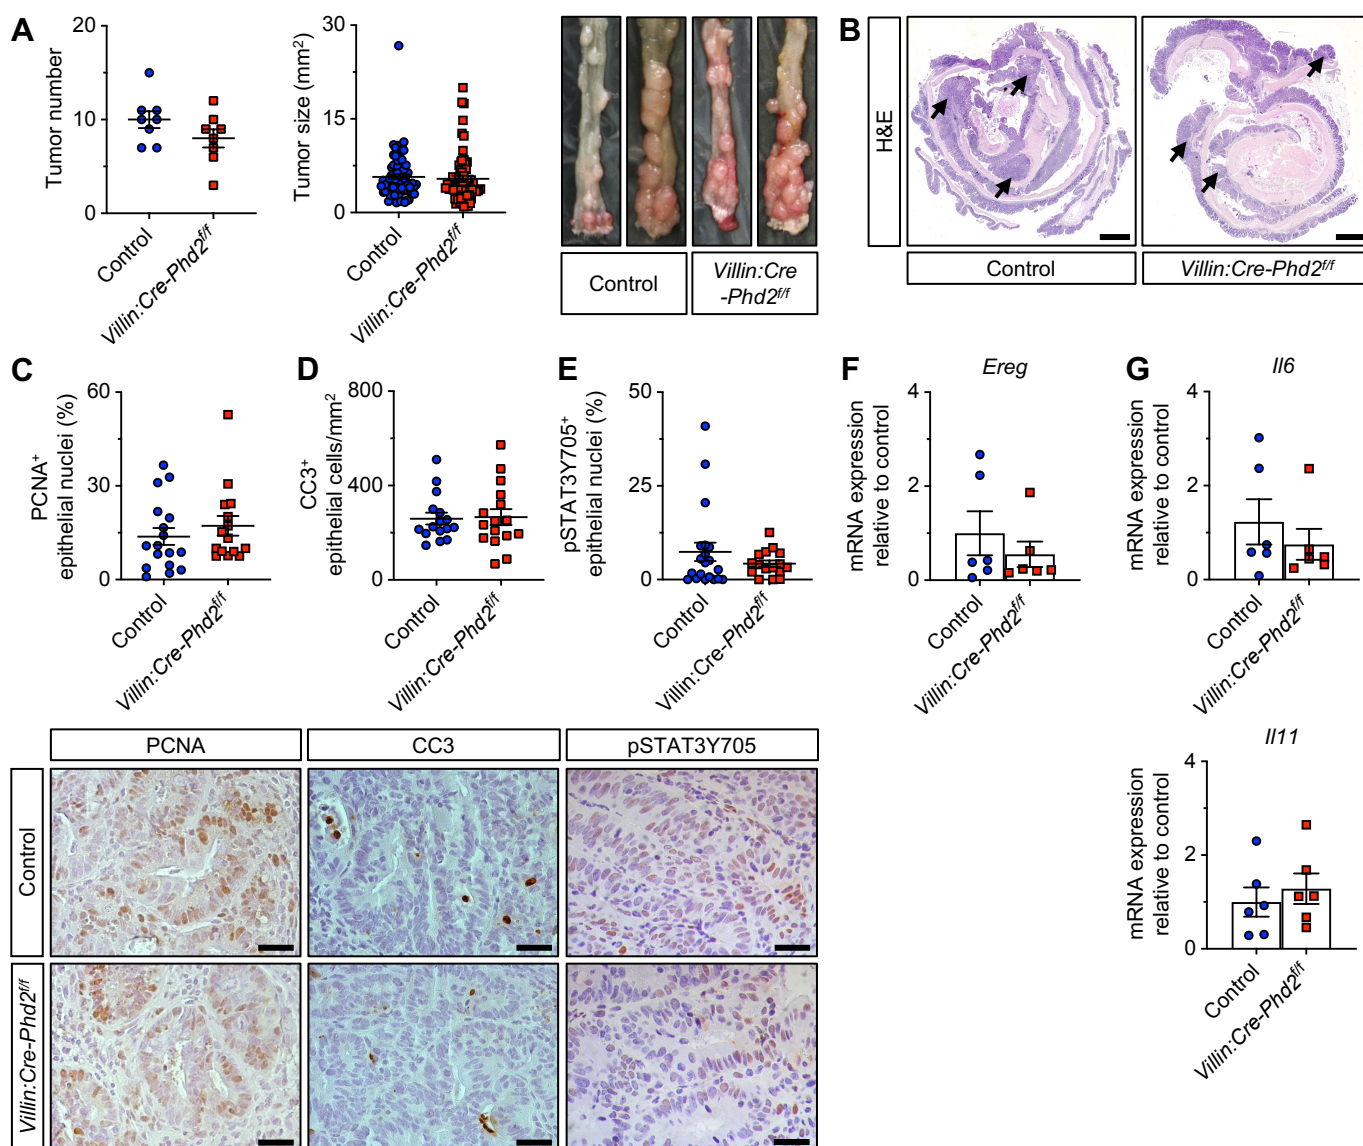

**Supplemental Figure 7.** (A) Macroscopic quantification of AOM/DSS-induced tumors in *Phd2<sup>ff</sup>* (control) and *Villin:Cre-Phd2<sup>ff</sup>* mice. Number of tumors per mouse (left; control: n = 8, *Villin:Cre-Phd2<sup>ff</sup>*: n = 8 mice) and size of individual tumors (right; control: n = 80, *Villin:Cre-Phd2<sup>ff</sup>*: n = 64 tumors). Representative macroscopic images of colons from control and *Villin:Cre-Phd2<sup>ff</sup>* mice (right). (B) H&E stainings of colons from control and *Villin:Cre-Phd2<sup>ff</sup>* mice. Arrows indicate colitis-associated tumors. Scale bar = 2 mm. (C) Quantification of epithelial PCNA immunostaining in control (n = 17) and *Villin:Cre-Phd2<sup>ff</sup>* (n = 15) tumors and representative histological images (bottom). Scale bar = 25  $\mu$ m. (D) Quantification of epithelial CC3 immunostaining in control (n = 16) and *Villin:Cre-Phd2<sup>ff</sup>* (n = 16) tumors and representative histological images (bottom). Scale bar = 25  $\mu$ m. (E) Quantification of epithelial nuclear pSTAT3Y705 immunostaining in control (n = 20) and *Villin:Cre-Phd2<sup>ff</sup>* (n = 16) tumors and representative histological images (bottom). Scale bar = 25  $\mu$ m. (F-G) qRT-PCR analysis of EGFR ligand *Ereg* (F) and *Il6* and *Il11* (G) mRNA expression in control (n = 6) and *Villin:Cre-Phd2<sup>ff</sup>* (n = 6) tumors. Statistical significance was calculated using Student's *t* test.

## SUPPLEMENTAL TABLES

| Score | Colonic epithelial damage                              | Inflammatory cell infiltration |                    | Score |
|-------|--------------------------------------------------------|--------------------------------|--------------------|-------|
| 0     | Normal epithelium                                      | Mucosa                         | Normal             | 0     |
| 1     | Hyperproliferation, irregular crypts, goblet cell loss |                                | Mild               | 1     |
| 2     | Mild to moderate crypt loss (10-50%)                   |                                | Modest             | 2     |
| 3     | Severe crypt loss (50-90%)                             |                                | Severe             | 3     |
| 4     | Complete crypt loss, surface epithelium intact         | Submucosa                      | Normal             | 0     |
| 5     | Small- to medium sized-ulcer (<10 crypt widths)        |                                | Mild to modest     | 1     |
| 6     | Large ulcer ( $\geq 10$ crypt widths)                  |                                | Severe             | 2     |
|       |                                                        | Muscle/serosa                  | Normal             | 0     |
|       |                                                        |                                | Moderate to severe | 1     |

**Supplemental Table 1. Histological scoring criteria for DSS-induced colitis.** As previously described by Katakura et al. (2). Scores for epithelial damage and inflammatory cell infiltration (separately assessed for mucosa, submucosa. and muscle/serosa) are added, resulting in a minimum score of 0 and a maximum score of 12.

**Supplemental Table 2. Primer sequences used for qRT-PCR**

| Gene          | Primer type (FW, forward/REV, reverse) | Primer sequence                |
|---------------|----------------------------------------|--------------------------------|
| <i>Il6</i>    | FW                                     | TTCCTCTCTGCAAGAGACTTC          |
|               | REV                                    | CTGTTGGGAGTGGTATCCTCTG         |
| <i>Il11</i>   | FW                                     | GGGGACATGAACTGTGTTTGT          |
|               | REV                                    | CAGGAGGGATCGGGTTAGGA           |
| <i>Mpo</i>    | FW                                     | CTGCAACAACAGACGAAGCC           |
|               | REV                                    | AGCCATTGCGATTGACTCCA           |
| <i>Ptgs2</i>  | FW                                     | TCCCATGGGTGTGAAGGGAAA          |
|               | REV                                    | ACCCAGGTCCTCGCTTATGA           |
| <i>Cxcl1</i>  | FW                                     | ACCCAAACCGAAGTCATAGCC          |
|               | REV                                    | TTGTCAGAAGCCAGCGTTCA           |
| <i>Cxcl2</i>  | FW                                     | TCCAAAAGATACTGAACAAAGGCA       |
|               | REV                                    | GCGAGGCACATCAGGTACG            |
| <i>Myc</i>    | FW                                     | CTTTCCTACCCGCTCAACG            |
|               | REV                                    | CTTCTTGCTCTTCTTCAGAGTCG        |
| <i>Birc5</i>  | FW                                     | GAACCCGATGACAACCCGAT           |
|               | REV                                    | GTTGGTCTCCTTTGCAATTTTGT        |
| <i>Bcl2l1</i> | FW                                     | TGCGTGGAAGCGTAGACAA            |
|               | REV                                    | ACAAAAGTGTCAGCCGC              |
| <i>Ereg</i>   | FW                                     | GACATGGACGGCTACTGCTT           |
|               | REV                                    | TGTAGCCCACTTCACATCTGC          |
| <i>Rn18s</i>  | FW                                     | GTAACCCGTTGAACCCCAT            |
|               | REV                                    | CCATCCAATCGGTAGTAGCG           |
| <i>Actb</i>   | FW                                     | TATAAAACCCGGCGGCGCA            |
|               | REV                                    | TCATCCATGGCGAACTGGTG           |
| <i>Areg</i>   | FW                                     | CTGAGGACAATGCAGGGTAA           |
|               | REV                                    | AACCATCCGAAAGCTCCACT           |
| <i>Egf</i>    | FW                                     | TTCTGGGTTTCAGGACAGTGG          |
|               | REV                                    | GACAACTGTGCCGTGCTTG            |
| <i>Hbegf</i>  | FW                                     | AGGACTTGGAAGGGACAGA            |
|               | REV                                    | CCCATTCTTTCTTTGCTTGG           |
| <i>Btc</i>    | FW                                     | ATGGACCCAACAGCCCCGGGTAGCAGTGTC |
|               | REV                                    | TAACCGTTAAGCAATATTGGTCTCTTGAAT |
| <i>Ep gn</i>  | FW                                     | GAGCGAAGAAGCAGAGGTGATC         |
|               | REV                                    | GGTCTTCCAGACAAGGATGAGAG        |
| <i>Tgfa</i>   | FW                                     | AGCCAGAAGAAGCAAGCCATCACT       |
|               | REV                                    | TCATTCTCGGTGTGGGTTAGCAA        |
| <i>Egfr</i>   | FW                                     | GAAGAAGTGCCCCCGAACT            |
|               | REV                                    | TCGTAGTAGTCAGGCCACACA          |

## REFERENCES

1. Greten FR, Eckmann L, Greten TF, Park JM, Li ZW, Egan LJ, et al. IKKbeta links inflammation and tumorigenesis in a mouse model of colitis-associated cancer. *Cell*. 2004;118(3):285-96.
2. Katakura K, Lee J, Rachmilewitz D, Li G, Eckmann L, and Raz E. Toll-like receptor 9-induced type I IFN protects mice from experimental colitis. *J Clin Invest*. 2005;115(3):695-702.
3. Kiss J, Mollenhauer M, Walmsley SR, Kirchberg J, Radhakrishnan P, Niemietz T, et al. Loss of the oxygen sensor PHD3 enhances the innate immune response to abdominal sepsis. *J Immunol*. 2012;189(4):1955-65.
4. Neufert C, Becker C, Tureci O, Waldner MJ, Backert I, Floh K, et al. Tumor fibroblast-derived epiregulin promotes growth of colitis-associated neoplasms through ERK. *J Clin Invest*. 2013;123(4):1428-43.
5. Olesch C, Sirait-Fischer E, Berkefeld M, Fink AF, Susen RM, Ritter B, et al. S1PR4 ablation reduces tumor growth and improves chemotherapy via CD8<sup>+</sup> T cell expansion. *J Clin Invest*. 2020;130(10):5461-76.
